# Supplementary material
Source: MDPI journal article supplement (https://www.mdpi.com/2071-1050/11/9/2541)
Supplement: s1 [file s1]

Supplementary Materials:

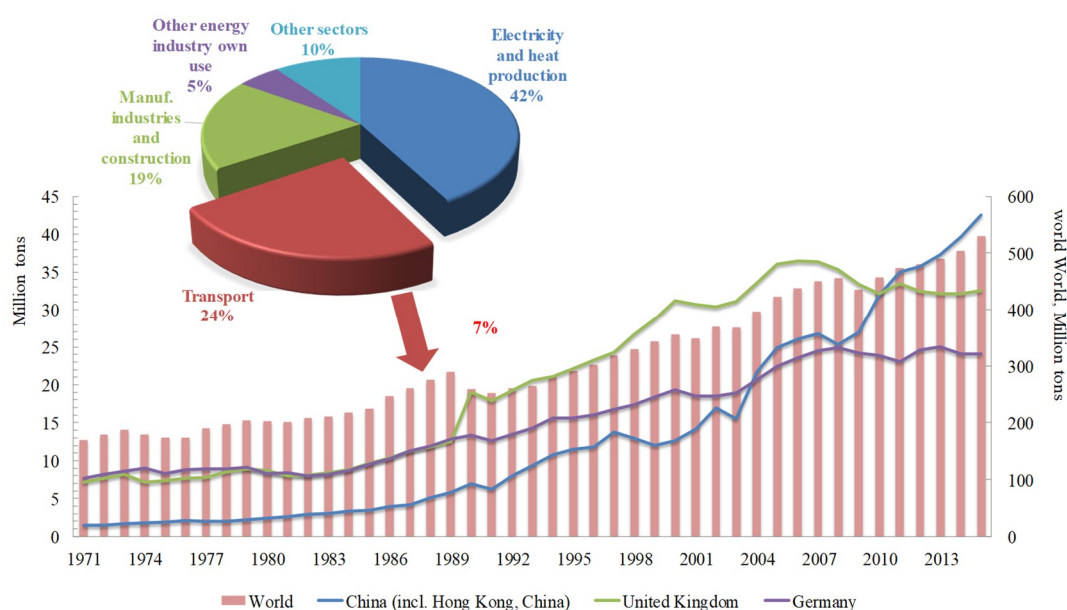

Figure S1. Carbon emissions of transportation and aviation industry [9].

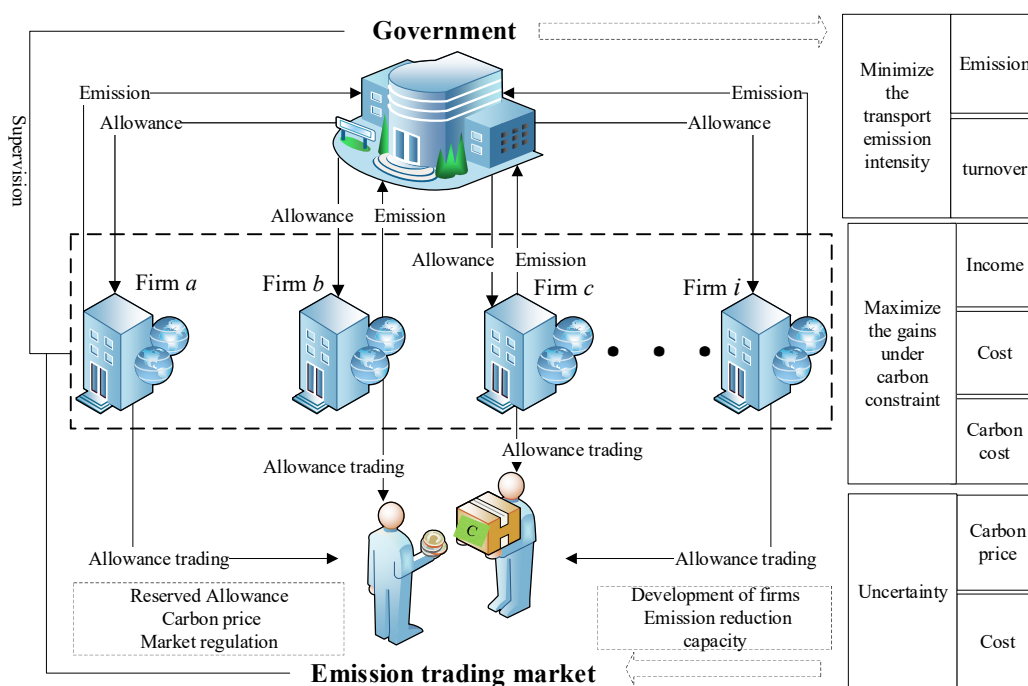

Figure S2. The conceptual model of MCAA in the aviation industry.

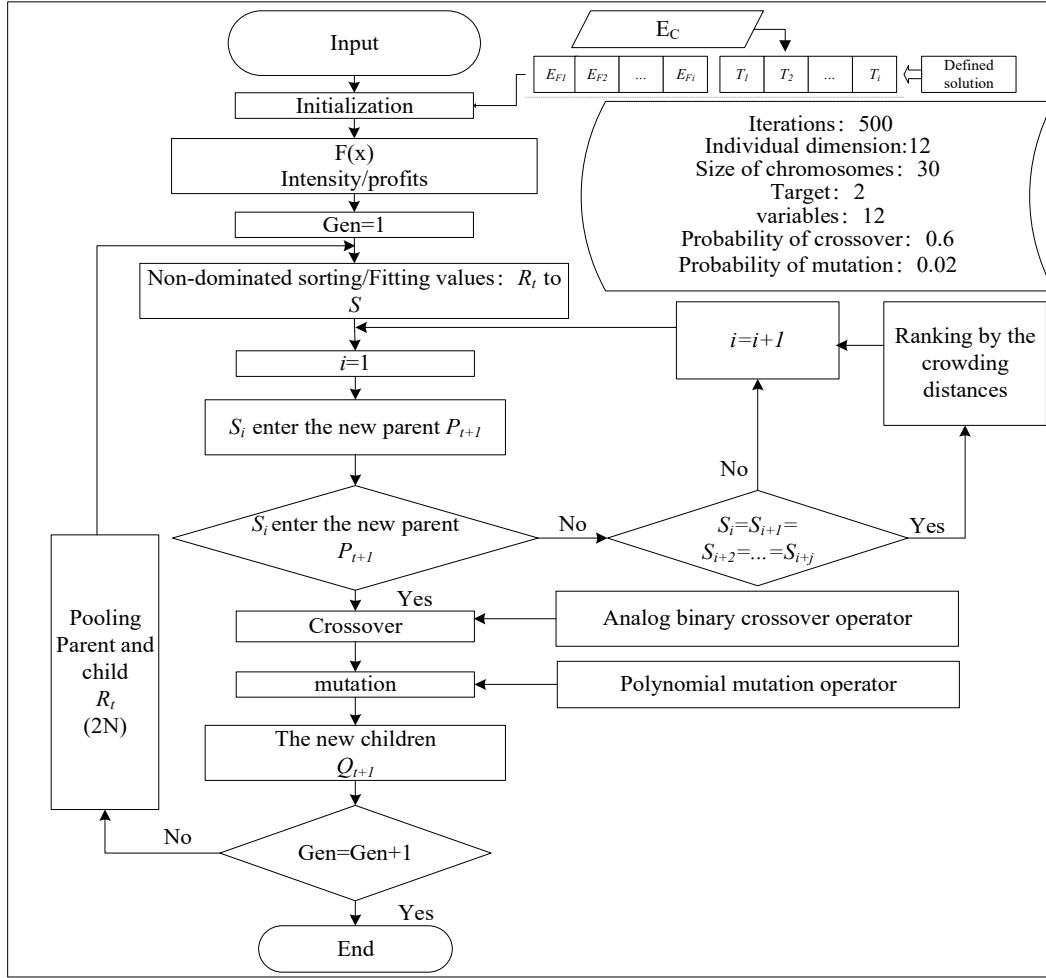

**Figure S3.** The solution process of multi-objective genetic algorithm. Note: The solution process is to initialize the group, calculate our target value, sort, and compare the crowded distances of the same level, and then select the non-inferior solution to enter the crossover, mutation, and iteration, and finally work out the optimal solutions.

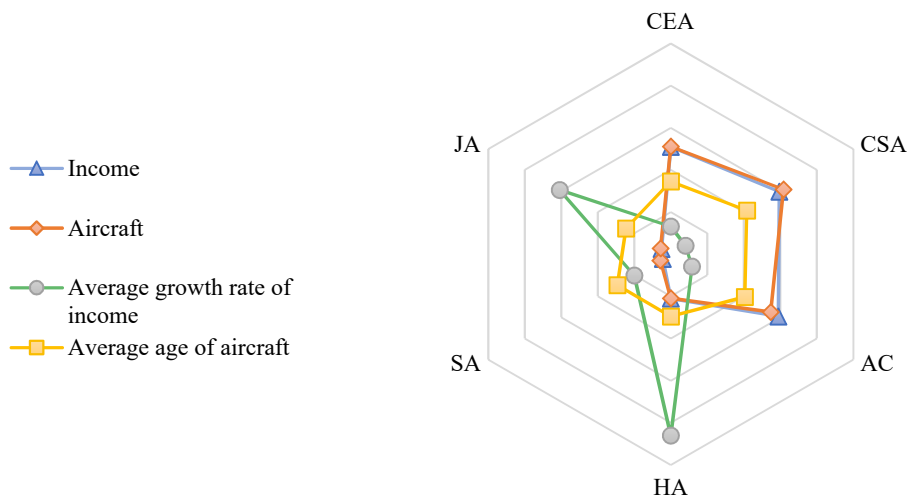

**Figure S4.** Categories of 6 airlines.

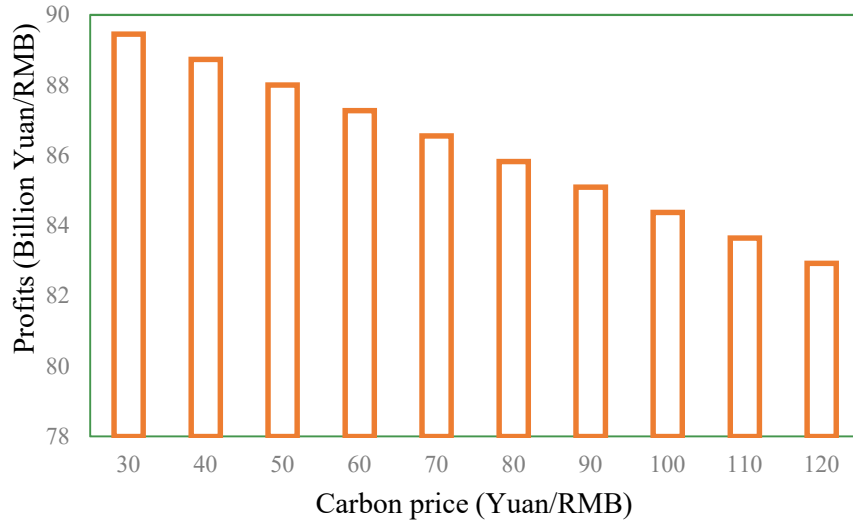

**Figure S5.** Relationship between the carbon price and firms' profits.

**Table S1.** Description of parameters and variables.

| Function           | Description                                                                                          |
|--------------------|------------------------------------------------------------------------------------------------------|
| $E_i$              | Actual emissions of firm $i$                                                                         |
| $T_i$              | Tons and kilometers of output                                                                        |
| $p_i$              | Price of per transportation of firm $i$                                                              |
| $C_i$              | Cost of firm $i$                                                                                     |
| $p_c$              | The carbon price, which is 30 RMB according to China's ETS                                           |
| $E_{ti}$           | Emissions trading volume                                                                             |
| Parameters         | Description                                                                                          |
| $E_i$              | Actual emissions of firm $i$                                                                         |
| $p_i$              | Price per instance of transportation of firm $i$ ; equal to the average of their historical price    |
| $C_i$              | Cost of firm $i$                                                                                     |
| $p_c$              | The carbon price, which is 30 RMB according to China's ETS                                           |
| $E_{ti}$           | Emissions trading volume                                                                             |
| $E_C$              | The total quotas                                                                                     |
| $Q_{fuel}^{CO_2}$  | The quantity of fuel emitting CO <sub>2</sub>                                                        |
| $F_{fuel}^{CO_2}$  | Emission factor, which indicates the CO <sub>2</sub> emissions of fuel's combustion                  |
| $E_i^{\min}$       | Minimum emissions of Firm $i$ , which is 80% of the minimum actual emissions in the past three years |
| $E_{ti}^+$         | Amount of allowance that Firm $i$ purchases                                                          |
| $E_{ti}^-$         | Amount of allowance that Firm $i$ sells                                                              |
| $d_i^{\min}$       | The minimum value in the total turnover of Firm $i$ in the past three years                          |
| $d_i^{\max}$       | 120% of the maximum value in the total turnover of Firm $i$ in the past three years                  |
| Decision Variables | Description                                                                                          |
| $T_i$              | Tons and kilometers of output                                                                        |
| $E_{Fi}$           | Free allowance volume of Firm $i$                                                                    |
